# Supplementary material
Source: ML conference proceedings conference paper supplement (https://openaccess.thecvf.com/content/WACV2025/html/Si_Long-Term_Ad_Memorability_WACV_2025_paper.html)
Supplement: Supplementary file 1 [file Si_Long-Term_Ad_Memorability_WACV_2025_supplemental.pdf]

## Appendix

### A. Generation of Ads using Henry-SEED

Henry-SEED takes as input a prompt consisting of the title of the ad to be generated and the brand name and generates the scene-by-scene verbalization of cognitive and visual concepts and voiceover. Listings 1-10 gives the input and output of a few randomly chosen examples of advertisements generated by Henry-SEED are shown below. Using the output script generated by Henry-SEED, we next prompt Adobe Firefly [1] with Henry-SEED's output to generate the visualization. Next, OCR from the Henry-SEED generated verbalization is put on top of the generated images manually. We provide visualizations for easier understanding (Figs. 3-6), along with the raw generations (Listings 1-10).

Listing 1. Advertisement generated by Henry-SEED for the Costco Ad. Original Ad: <https://www.youtube.com/watch?v=uT721JhUUS0>

```
Input Title: "Maytag Overnight Wash and Dry" for the brand Costco

Generated Ad: "The ad is shot in landscape orientation , at a medium pace .

Scene 1: The scene shows a person standing in front of a washer and dryer
Emotions: comforting , comfortable
Tags: appliance , laundry , laundry room , man
Voiceover: "Maytag has taken the laundry room by storm with their overnight wash and dry."
Colors: Gray , Off.White , Silver , White , Black , Dark.Gray

Scene 2: The scene shows a person lying on a bed pressing a button on a cell phone
Emotions: gift , birthday , holiday
Tags: button , catch , smartphone , hand
Voiceover: "Imagine going to bed with dirty clothes and waking up to a fresh , clean load. All without leaving the house. It's like having your own personal laundry assistant."
Colors: Gray , Silver , Black , Dark.Gray , Dark.Brown

Scene 3: The scene shows a man and woman embracing while a washer and dryer are in the background
Emotions: love , happiness , togetherness
Tags: couple , hug , laundry , laundry room
Voiceover: "Never fight over the laundry room again."
Colors: Gray , Off.White , Silver , White , Black , Dark.Gray

Scene 4: The scene shows a logo of Maytag
Emotions: trust , confidence
Tags: logo , Maytag
Voiceover: "Get a Maytag and enjoy the luxury of time."
Colors: Off.White , Silver , White , Black , Dark.Gray , Gray
"
```

Listing 2. Advertisement generated by Henry-SEED for the Prudential Financial Ad. Original Ad: <https://www.youtube.com/watch?v=JPfi0P-0nwU>

```
Input Title: "Financial Professional Tips: Planning for Your Own Care" for the brand Prudential Financial

Generated Ad: "The ad is shot in landscape orientation , at a low pace .

Scene 1: The scene shows a woman looking thoughtfully at a laptop on her desk
Emotions: concern and contemplation
Tags: computer , laptop , office , woman
Colors: Gray , Dark.Blue

Scene 2: The scene shows the same woman now with a slight frown as she examines papers that appear to be medical bills
Emotions: worry and realization
Tags: bills , healthcare , paperwork , desk
Voiceover: "Long-Term Care is one of the most important issues in financial planning , but it's not always easy to talk about."
Colors: Gray , Dark.Blue

Scene 3: The scene shows the woman engaging in a conversation with a financial professional
Emotions: engagement and interest
Tags: consultation , financial advisor , discussion , office
Voiceover: "As a Financial Professional , I can help you evaluate your options and determine how much you may need to set aside each month."
Colors: Olive , Gray
```

```
Scene 4: The scene shows the woman in deep thought , looking out of a window while holding a pen and notepad , suggesting planning and reflection
Emotions: contemplation and seriousness
Tags: planning , reflection , window , notepad
Colors: Sky.Blue , Light.Gray
```

```
Scene 5: The scene transitions back to show the woman nodding in understanding as she listens to the financial professional , visibly gaining confidence
Emotions: comprehension and confidence
Tags: financial professional , office , learning , agreement
Voiceover: "Most people believe that they can rely on Medicare to pay for their long-term care expenses. But the truth is , Medicare typically only covers about 65% of the cost of a nursing home stay and only about 32% of the cost of an assisted living stay."
Colors: Gray , Dark.Blue
```

```
Scene 6: The scene shows the woman now jotting down notes actively , with a look of determination on her face
Emotions: determination and proactivity
Tags: planning , notetaking , strategy , office
Voiceover: "So if you're a typical American , you'll need about $100,000 to cover the remaining costs of long-term care."
Colors: Gray , Dark.Blue
```

```
Scene 7: The scene shifts to the woman shaking hands with the financial professional , symbolizing a plan set in motion
Emotions: satisfaction and trust
Tags: handshake , agreement , financial planning , commitment
Colors: Gray , Dark.Blue
```

```
Scene 8: The scene cuts to the woman now at home , relaxed and smiling , speaking on the phone , perhaps sharing her relief and positive steps taken with a loved one
Emotions: relief and happiness
Tags: home , communication , personal life , reassurance
Voiceover: "Let's talk about a plan for your own care."
Colors: Cream , Soft.Green
```

```
Scene 9: The final scene zooms out to a serene image of the woman walking in a park , symbolizing peace of mind about her future
Emotions: contentment and peace
Tags: park , walking , future , peace of mind"
Colors: Sky.Blue , Green
```

Listing 3. Advertisement generated by Henry-SEED for an Adidas Ad. Original Ad: <https://www.youtube.com/watch?v=fujboh-W7Sk>

```
Input Title: "I'M POSSIBLE | IMPOSSIBLE IS NOTHING | Adidas" for the brand Adidas

Generated Ad: "The ad is shot in landscape orientation , at a medium pace .

Scene 1: The scene shows a man facing a rock climbing wall , poised to start his ascent
Emotions: anticipation and focus
Tags: athletic , climb , climber , rock
Voiceover: "What is possible is up to you."
Colors: Gray , Dark.Brown

Scene 2: The scene shows a man as he begins to climb , gripping the rock tightly
Emotions: determination and strain
Tags: athletic , climb , climber , hand
Voiceover: "Don't let anyone tell you otherwise."
Colors: Dark.Gray , Dark.Brown

Scene 3: The scene shows the man midway up the rock wall , reaching for a distant handhold
Emotions: perseverance and challenge
Tags: athletic , climb , climber , hand
Colors: Black , Dark.Gray

Scene 4: The scene captures a moment where the man slips but regains his grip on the rock face , muscles tensing
Emotions: tension and danger
Tags: athletic , climb , climber , hand
Colors: Dark.Gray , Dark.Brown

Scene 5: The scene shows the man pausing to chalk his hands , his breath visible in the cool air
Emotions: calm and preparation
Tags: athletic , chalk , climb , climber
Colors: Gray , Dark.Brown

Scene 6: The scene shows the man navigating a particularly difficult part of the climb , his movements precise and deliberate
Emotions: concentration and determination
Tags: athletic , climb , climber , hand
Colors: Black , Dark.Gray

Scene 7: The scene shows the climber's face , sweat beading on his forehead , reflecting the intensity of his effort
Emotions: grit and resolve
Tags: athletic , climb , climber , determination
Colors: Dark.Gray , Dark.Brown

Scene 8: The scene shows the man reaching for the final ledge , the clear sky behind him signaling the nearing end of his ascent
Emotions: anticipation and effort
Tags: athletic , climb , climber , hand
```

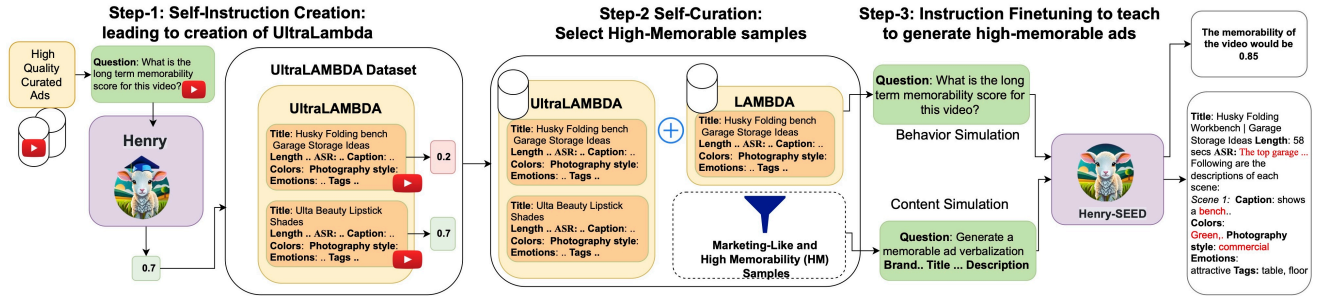

Figure 4. Overview of our SEED method for memorable ad generation. Our self-alignment consists of three steps: (i) **Self-instruction creation**: We first collect 5 million high-quality ads from YouTube, Facebook, and other mediums. Henry (trained on the complete train+test sets of LAMBDA) is then used to rate this curated set in an LLM-as-a-Judge fashion. (ii) **Self-curation**: We select marketing-like and high-memorability samples from the UltraLAMBDA and LAMBDA datasets. (iii) **Instruction fine-tuning**: Henry-SEED is trained on the self-curated set using two tasks: Behavior Simulation and Content Simulation.

Voiceover: "Impossible is not an obstacle."  
Colors: Dark.Gray, Gray, Dark.Brown, Blue

Scene 9: The scene shows the man pulling himself onto the summit, his body silhouetted against the sky  
Emotions: triumph and exhilaration  
Tags: athletic, climb, climber, hand  
Voiceover: "It's a chance to prove them wrong."  
Colors: Dark.Gray, Dark.Brown, Blue

Scene 10: The scene shows the man standing on top of the rock with his arms raised in victory, overlooking the landscape below  
Emotions: achievement and elation  
Tags: athletic, arms up, climb, climber"  
Colors: Dark.Gray, Dark.Brown

Listing 4. Advertisement generated by Henry-SEED for an Amazon ad. Original Ad: <https://www.youtube.com/watch?v=rcFTqs-zSH4>

Input Title: "Alexa Auto, Listening to Audiobooks" for the brand Amazon

Generated Ad: "The ad is shot in landscape orientation, at a low pace.

Scene 1: The scene shows a car driving down a country road near a mountain house  
Emotions: anticipation, freedom  
Tags: blue, car, drive, house  
Colors: White, Lavender, Dark.Blue, Turquoise, Black

Scene 2: The scene shows an image of a car approaching a large sign above the road, signaling the start of the highway  
Emotions: curiosity, readiness  
Tags: car, drive, road sign, highway  
Voiceover: "You just pulled onto the highway"  
Colors: White, Lavender, Turquoise, Gray

Scene 3: The scene shows an in-car view with a driver's hands on the steering wheel, a smartphone mounted on the dashboard displaying the Amazon Music app  
Emotions: concentration, engagement  
Tags: car interior, hands, smartphone, technology  
Voiceover: "but you can't remember the name of that band that's been stuck in your head all morning."  
Colors: White, Dark.Blue, Black, Gray

Scene 4: The scene shows the driver speaking to Alexa through the car's infotainment system, the display lighting up in response  
Emotions: interaction, ease  
Tags: car interior, voice command, infotainment system  
Voiceover: "With Alexa and Amazon Music, you don't have to remember. Just ask, "Alexa, play the Beatles."  
Colors: White, Lavender, Dark.Blue, Black

Scene 5: The scene shows the car passing through a landscape with rolling hills and the sun beginning to set in the background  
Emotions: satisfaction, serenity  
Tags: car, drive, hills, sunset  
Colors: White, Lavender, Turquoise, Dark.Blue

Scene 6: The final scene shows the vehicle driving into the horizon, as the iconic music of the Beatles fills the car's interior  
Emotions: fulfillment, joy  
Tags: car, drive, horizon, music"  
Colors: White, Lavender, Orange, Dark.Blue

Listing 5. Advertisement generated by Henry-SEED for an Gatorade ad. Original Ad: <https://www.youtube.com/watch?v=BKPQkjRF4yY>

Input Title: "Gatorade | Make Your Own Footsteps with Suni Lee" for the brand Gatorade

Generated Ad: "The ad is shot in landscape orientation, at a medium pace.

Scene 1: The scene shows Sunisa Manado standing in front of her house  
Emotions: determination, brave, confident, persistence, courage  
Tags: athletic, face, girl, muscle  
Voiceover: "I'm Sunisa Manado, but you can call me Sunisa. And I'm going to show you how I stay motivated. Let's go! This is my neighborhood. I'm going to take you through my favorite spots. There's my house right there."  
Colors: Dark.Brown, Black, Brown, Tan

Scene 2: The scene shows Sunisa Manado performing a handstand in the park  
Emotions: achievement, determination, persistence, commitment, success  
Tags: balance, gymnast, handstand, girl  
Voiceover: "And this is the park where I get so much done. This is the park where I train."  
Colors: Dark.Brown, Dark.Blue, Purple, Gray

Scene 3: The scene shows Sunisa Manado doing a flip on the balance beam  
Emotions: brave, courage, determination, persistence, inspiration  
Tags: gymnast, flip, beam, girl  
Voiceover: "Being an athlete takes a lot of hard work and determination."  
Colors: Dark.Brown, Dark.Blue, Purple, Gray

Scene 4: The scene shows Sunisa Manado in a powerful pose in her pink sports bra and leotard  
Emotions: determination, brave, courage, persistence, inspiration  
Tags: athletic, face, girl, gymnast  
Colors: Dark.Brown, Dark.Blue, Purple, Gray

Scene 5: The scene shows Sunisa Manado lifting herself on the parallel bars  
Emotions: achievement, persistence, determination, courage, commitment  
Tags: gymnast, lift, bars, girl  
Voiceover: "And being an athlete also means that you have to have good nutrition."  
Colors: Dark.Brown, Dark.Blue, Purple, Gray

Scene 6: The scene shows Sunisa Manado practicing her routine on the floor of the park  
Emotions: determination, persistence, inspiration, commitment, discipline  
Tags: floor, gymnast, routine, girl  
Colors: Dark.Brown, Dark.Blue, Purple, Gray

Scene 7: The scene shows Sunisa Manado spinning on the balance beam  
Emotions: success, brave, determination, precision, focus  
Tags: beam, spin, gymnast, girl  
Colors: Dark.Brown, Dark.Blue, Purple, Gray

Scene 8: The scene shows Sunisa Manado holding a bottle of Gatorade, rehydrating after her practice  
Emotions: refreshed, healthy, satisfaction, wellbeing, recovery  
Tags: athlete, drink, Gatorade, health  
Voiceover: "That's why I choose to fuel up with Gatorade. You need to have that energy, especially during my toughest training."  
Colors: Black, Dark.Green, Dark.Gray, Gray

Scene 9: The scene shows Sunisa Manado smiling towards the camera with a sense of pride and accomplishment  
Emotions: joy, confidence, pride, optimism, accomplishment  
Tags: face, smile, girl, gymnast  
Voiceover: "Gatorade helps replenish what I've lost and helps keep me going."  
Colors: Black, Dark.Green, Dark.Gray, Gray

Scene 10: The scene shows Sunisa Manado walking away from the park, as the sun sets, symbolizing the end of a day's hard work

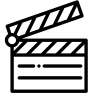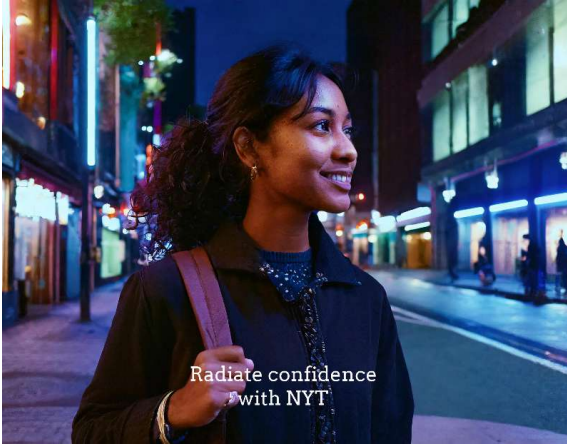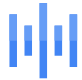

"The New York Times is shining a light on women's rights. For 150 years, The Times has held those in power accountable."

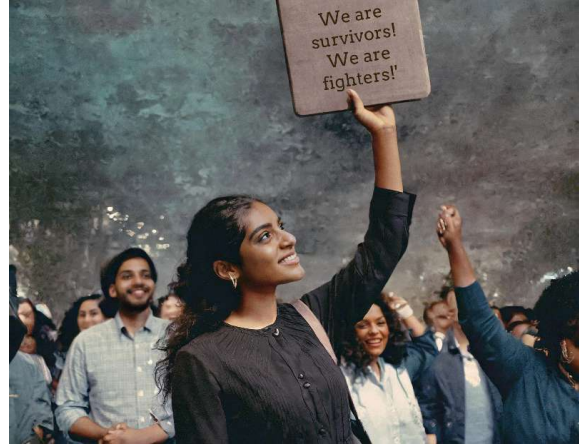

"From the fight for pay equality to the battle against harassment"

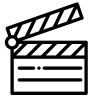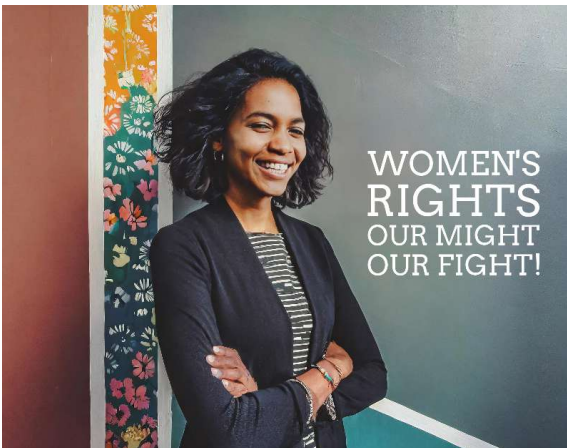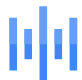

"The Times is telling the stories of women around the world. Join us in supporting our women."

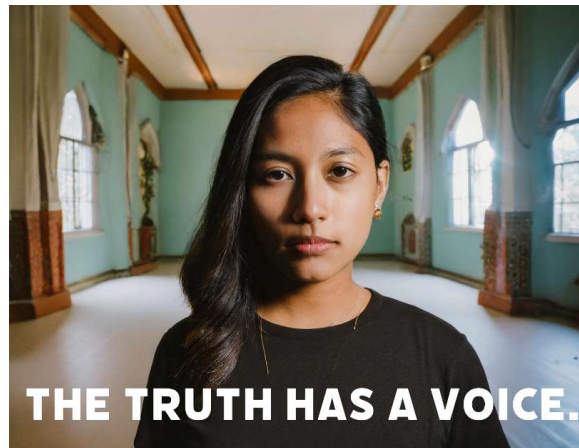

"Subscribe to The New York Times. The truth has a voice."

Figure 5. Henry-SEED Prompt: Generate the detailed description of a 50 second memorable advertisement titled "Shining a Light on Women's Rights — The Truth Has a Voice — The New York Times" for the brand The New York Times Link to the original ad: <https://www.youtube.com/watch?v=bPb1zhUzTeg> Original memorability score: 65. Memorability score of Generated Ad: 91.

Emotions: contemplation, fulfillment, anticipation, resilience, hope  
Tags: sunset, walk, reflection, girl  
Voiceover: "I'm going to make my own footsteps. Follow your dreams, but don't forget to chase your greatness."  
Colors: Black, Dark.Green, Dark.Gray, Gray"

Listing 6. Advertisement generated by Henry-SEED for a Rolex ad.  
Original Ad: <https://www.youtube.com/watch?v=vA-Lxmh1MdQ>

Input Title: "Rolesor A Meeting of Metals" for the brand Rolex  
Generated Ad: "The ad is shot in landscape orientation, at a low pace."  
Scene 1: The scene shows a close up of a watch that is on a wrist  
Emotions: anticipation, luxury, elegance  
Tags: dial, gold, watch  
Colors: Dark.Brown, Brown, Black, Khaki

Scene 2: The scene shows a gold and silver watch sitting on a table, reflecting soft light  
Emotions: sophistication, status, success  
Tags: dial, gold, watch  
Colors: Brown, Dark.Brown, Khaki, Black

Scene 3: The scene shows a person's hands elegantly wrapping the gold and silver watch in delicate gift paper  
Emotions: care, generosity, surprise  
Tags: wrapping, gift, luxury  
Colors: Brown, Khaki, Gold, White

Scene 4: The scene shows a recipient's joyous reaction as they receive the watch as a gift at a celebratory gathering  
Emotions: happiness, gratitude, celebration  
Tags: emotion, celebration, gift  
Colors: Gold, Silver, Cream, Warm hues, Soft lighting

Scene 5: The scene shows the watch being worn at an elegant event, the gold and silver glinting under ambient lighting  
Emotions: pride, accomplishment, refinement  
Tags: elegance, luxury, watch  
Colors: Gold, Silver, Black, Soft lighting, Dark hues

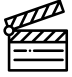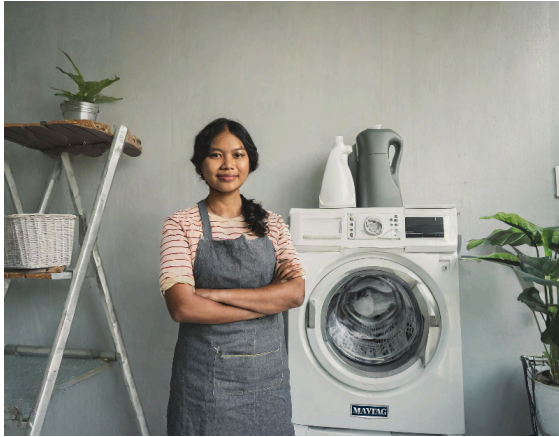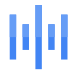

"Maytag has taken the laundry room by storm with their overnight wash and dry."

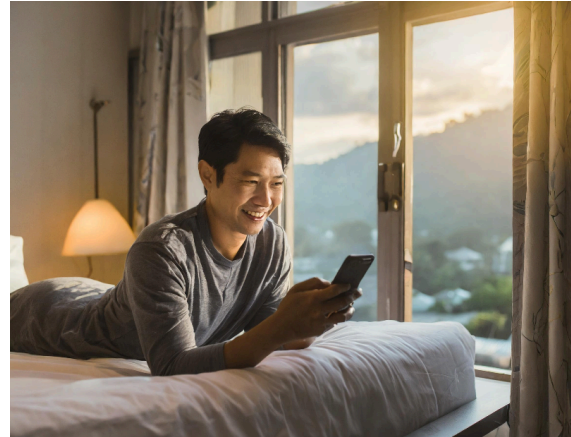

"Imagine going to bed with dirty clothes and waking up to a fresh, clean load. All without leaving the house. It's like having your own personal laundry assistant."

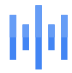

"All without leaving the house. It's like having your own personal laundry assistant."

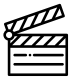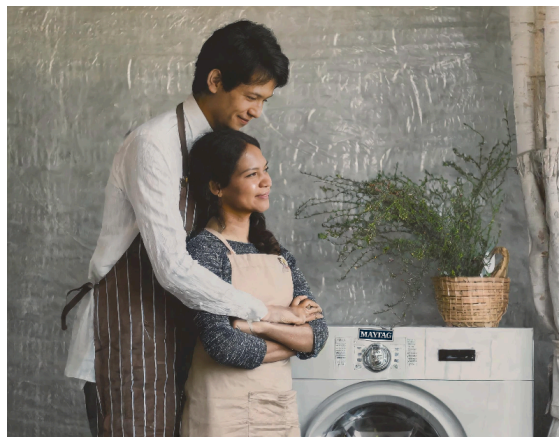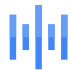

"Never fight over the laundry room again. Get a Maytag and enjoy the luxury of time."

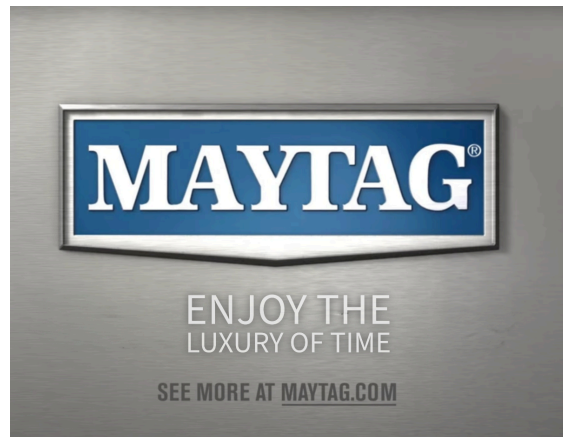

"Maytag, Enjoy the luxury of time"

Figure 6. Henry-SEED Prompt: *Generate the detailed description of a 18 second memorable advertisement titled "Maytag Overnight Wash and Dry" for the brand Costco.* Link to the original ad: <https://www.youtube.com/watch?v=uT721JhUUS0> Original memorability score: 76. Memorability score of the generated Ad: 83

Listing 7. Advertisement generated by Henry-SEED for an NVIDIA ad. Original Ad: <https://www.youtube.com/watch?v=HnaOhOJ6AcM>

Input Title: "Pac Man 256 on NVIDIA SHIELD" for the brand Nvidia  
Generated Ad: "The ad is shot in landscape orientation , at a medium pace. "

Scene 1: The scene shows a black and white logo.  
Emotions: danger , tough  
Tags: brand , logo  
The text shown in the scene is 'SHIELD'  
Colors: Black , White , Gray

Scene 2: The scene shows a black screen with a red light on it  
Emotions: danger , tough  
Tags: brand , logo , text  
The text shown in the scene is 'SHIELD'

Colors: Black , White , Red

Scene 3: The scene shows a computer screen showing a game of Pac-Man  
Emotions: nostalgia , fun  
Tags: arcade , arcade machine , game , Pac-Man  
The text shown in the scene is 'HIGH SCORE'  
Colors: Cyan , Yellow , Gray , Dark Green , Red

Scene 4: The scene shows a video game character navigating a maze filled with obstacles  
Emotions: excitement , challenge  
Tags: arcade , character , game , maze  
The text shown in the scene is 'LEVEL UP'  
Colors: Cyan , Red , Pink , Orange , Gray

Scene 5: The scene shows a video game with a racing theme , cars zooming on the track  
Emotions: thrill , speed  
Tags: racing , cars , game , screenshot  
The text shown in the scene is 'NEW RECORD'

Colors: Red, Yellow, Blue, Gray, Black

Scene 6: The scene shows a strategy video game with a detailed world map  
Emotions: focus, strategy  
Tags: strategy game, world map, empire, video game  
The text shown in the scene is 'EXPAND YOUR EMPIRE'  
Colors: Green, Brown, Blue, White, Tan

Scene 7: The scene shows a futuristic virtual reality game with immersive graphics  
Emotions: amazement, innovation  
Tags: VR, virtual reality, future, game  
The text shown in the scene is 'ENTER NEW WORLDS'  
Colors: Neon Blue, Neon Green, Black, Dark Blue

Scene 8: The scene shows a family gathered around playing a multiplayer video game, laughing and enjoying  
Emotions: joy, togetherness  
Tags: family, multiplayer, game, living room  
The text shown in the scene is 'PLAY TOGETHER'  
Colors: Multi-colored, Warm Hues

Scene 9: The scene transitions to a player wearing headphones, deeply concentrated in an esports competition  
Emotions: determination, competition  
Tags: esports, competition, gamer, video game  
The text shown in the scene is 'RISE TO THE CHALLENGE'  
Colors: Black, Neon, Dark, Spotlights

Scene 10: The scene closes with the NVIDIA SHIELD logo emerging brightly on the screen  
Emotions: empowerment, assurance  
Tags: brand, logo, closing  
The text shown in the scene is 'NVIDIA. SHIELD - Game Your Way'  
Colors: Red, White, Black

Listing 8. Advertisement generated by Henry-SEED for a Zillow ad. Original Ad: <https://www.youtube.com/watch?v=P6gydrvTkaA>

Input Title: "Find It, Tour It and Own It With Zillow (:06)" for the brand Zillow

Generated Ad: "The ad is shot in landscape orientation, at a medium pace.

Scene 1: The scene shows a person holding a cell phone with their hand.  
Emotions: achievement, ambition  
Tags: catch, smartphone, hand, person, phone, screen, text message, woman  
Colors: Gray, Dark.Blue, Dark.Brown, Dark.Pink, Off.White

Scene 2: The scene shows a woman in a sweater looking at a cell phone.  
Emotions: happy, smile  
Tags: smartphone, earphone, girl, person, smile, woman  
Colors: Gray, Dark.Brown, Dark.Pink, Dark.Blue

Scene 3: The scene shows a woman looking at a phone with a map on it.  
Emotions: confident, smiling  
Tags: catch, smartphone, earphone, girl, person, phone, stand, talk, woman  
Colors: Gray, Dark.Brown, Dark.Pink, Dark.Blue

Scene 4: The scene shows a woman looking at a cell phone with a real estate app on it.  
Emotions: togetherness, happiness  
Tags: smartphone, earphone, girl, person, woman  
Colors: Gray, Dark.Brown, Dark.Pink, Dark.Blue

Scene 5: The scene shows a woman looking at a cell phone with a real estate app displayed.  
Emotions: happy, smiling  
Tags: smartphone, earphone, girl, person, woman  
Colors: Gray, Dark.Brown, Dark.Pink, Dark.Blue

Scene 6: The scene shows a woman using a cell phone to speak with an agent.  
Emotions: confident, happy  
Tags: smartphone, earphone, girl, person, talk, woman  
Colors: Gray, Dark.Brown, Dark.Pink, Dark.Blue  
Voiceover: "Getting the perfect home is a journey, so we help you find it, tour it, and own it."

Scene 7: The scene shows a woman completing a transaction on a cell phone.  
Emotions: achievement, satisfied  
Tags: smartphone, earphone, girl, person, woman  
Colors: Gray, Dark.Brown, Dark.Pink, Dark.Blue  
Voiceover: "For moving made simple, there's no place like Zillow"

Listing 9. Advertisement generated by Henry-SEED for a Kroger ad. Original Ad: <https://www.youtube.com/watch?v=SqwqI01q3fA>

Input Title: "How to Make Taco Seasoning | Kroger Recipes | Kroger" for the brand Kroger

Generated Ad: "The ad is shot in landscape orientation, at a low pace.

Scene 1: The scene shows a person pouring chipotle adobo sauce into a glass jar.  
Emotions: care, comfort

Tags: bottle, can, container, hand, food, person, jar, liquid, pepper, pour, red, sauce, tomato sauce, tin, tray, woman  
Colors: Black, Gray, Dark.Brown, Maroon, Dark.Red  
Voiceover: "The audio in the ad says Taco seasoning is one of those spices that everyone loves on their food. It's so delicious and it's so easy to make."

Scene 2: The scene shows a woman in a red sweater adding ground cumin to the mix.  
Emotions: anticipation, focus  
Tags: blender, container, food, hand, person, ingredient, measuring cup, spice, woman  
Voiceover: "All you have to do is get your chopstick and add some of the garlic and some of the onion and some of the cumin"  
Colors: Black, Gray, Dark.Brown, Maroon, Dark.Red

Scene 3: The scene shows the addition of chili powder to the seasoning mix.  
Emotions: precision, satisfaction  
Tags: blender, container, food, food processor, hand, person, ingredient, mixture, spice, woman  
Voiceover: "and some of the paprika and some of the oregano and some of the salt"  
Colors: Black, Gray, Dark.Brown, Dark.Pink, Maroon

Scene 4: The scene shows the woman sprinkling crushed red pepper into the mix.  
Emotions: excitement, zeal  
Tags: blender, container, food, food processor, hand, person, ingredient, measuring cup, mixture, spice, woman  
Voiceover: "and some of the paprika and some of the pepper and just give it a little bit of a squeeze"  
Colors: Black, Gray, Dark.Brown, Maroon, Dark.Red

Scene 5: The scene shows the woman measuring and adding ground oregano to the seasoning mix.  
Emotions: happiness, creativity  
Tags: blender, container, food, food processor, hand, person, ingredient, measuring cup, mixture, spice, woman  
Colors: Black, Gray, Dark.Brown, Maroon, Dark.Red

Scene 6: The scene shows the final steps of making the taco seasoning mix, with the woman adding garlic powder and onion powder.  
Emotions: accomplishment, pride  
Tags: blender, container, food, food processor, hand, person, ingredient, mixture, spice, woman  
Voiceover: "You're going to taste it, so don't be afraid to add more or less of any of these ingredients, depending on how spicy or how flavorful you want your taco seasoning to be."  
Colors: Black, Gray, Dark.Brown, Maroon, Dark.Red

Listing 10. Advertisement generated by Henry-SEED for a Publix ad. Original Ad: <https://www.youtube.com/watch?v=HH0VWvs-cFg>

Input Title: "GreenWise Ice Cream Scoop from Publix" for the brand Publix Supermarkets

Generated Ad: "The ad is shot in landscape orientation, at a low pace.

Scene 1: The scene shows a woman standing in front of a refrigerator.  
Emotions: anticipation, satisfaction  
Tags: beverage, bottle, catch, doorway, drink, fill, girl, home appliance, juice, laugh, pour, refrigerator, shirt, stand, woman  
Voiceover: "Greenwise, the better energy choice from Publix."  
Colors: Black, Gray, Dark.Gray, Dark.Brown, Silver

Scene 2: The scene shows a woman holding a roll of Greenwise ice cream in her hand.  
Emotions: curiosity, interest  
Tags: bottle, catch, hand, woman  
Voiceover: "All the deliciousness of ice cream, a fraction of the calories. And now it comes in a roll."  
Colors: Black, Gray, Dark.Gray, Dark.Brown

Scene 3: The scene shows the woman as she easily scoops the ice cream onto a plate, displaying the convenience of the new roll format.  
Emotions: ease, delight  
Tags: plate, roll, scoop, serve, woman  
Voiceover: "So you can easily scoop and serve exactly what you need."  
Colors: Black, Gray, Dark.Gray, Dark.Brown

Scene 4: The scene shows the woman enjoying a bite of the Greenwise ice cream, her expression reflecting the product's deliciousness.  
Emotions: enjoyment, satisfaction  
Tags: bite, enjoyment, ice cream, satisfaction, taste, woman  
Voiceover: "It's a win-win. Learn more at publix.com."  
Colors: Black, Gray, Dark.Gray, Dark.Brown

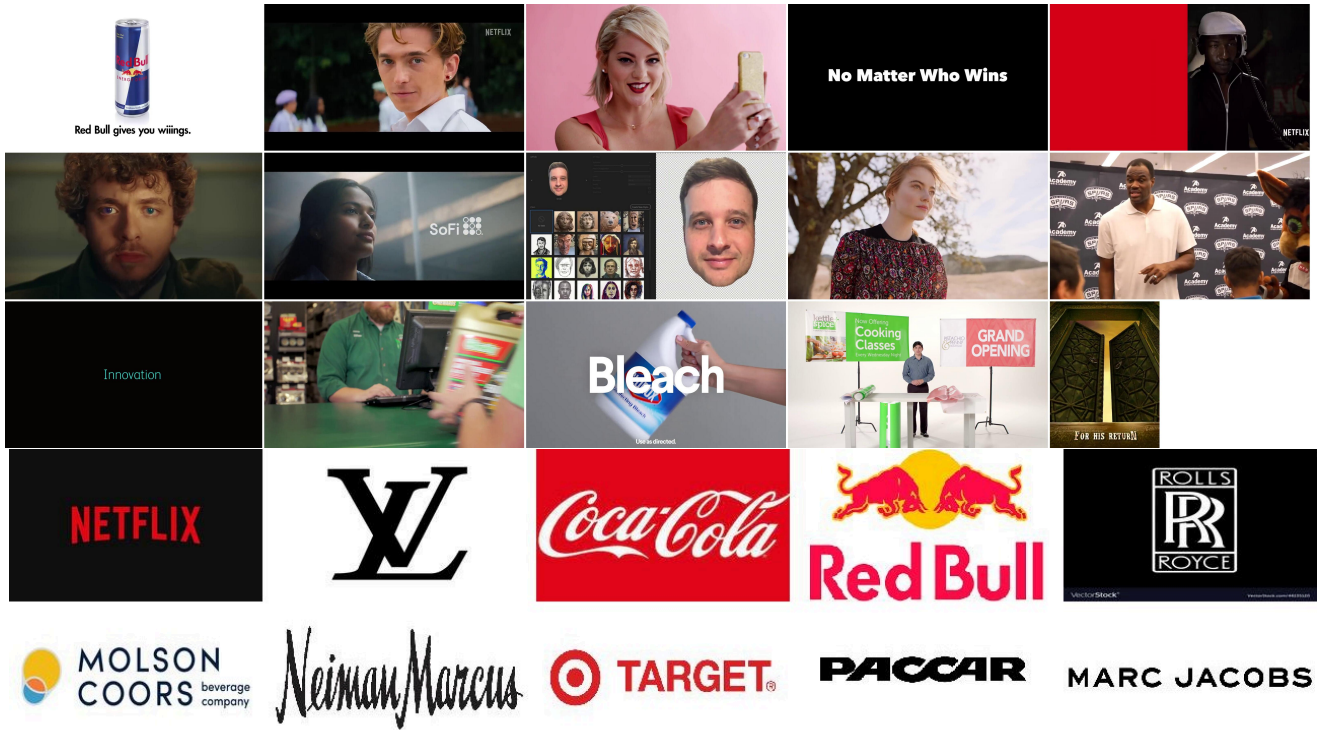

Figure 7. The top three rows show the keyframes from videos in our dataset, LAMBDA, arranged from most to least memorable. The bottom two rows show brands arranged from the most memorable brands to the least.

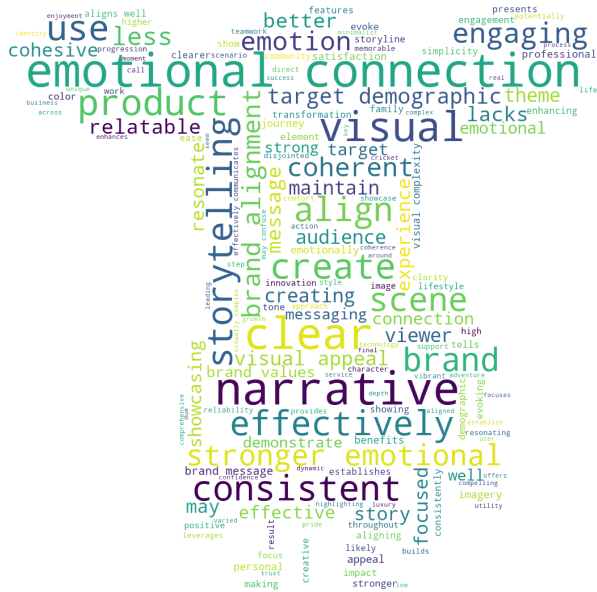

Figure 8. Word Cloud for the GPT-4 reasoning on the 75/88 generations where it rates Henry-SEED Generated Ads to be better than the Original.

## B. Extraction And Use Of Cognitive And Perceptual Signals In Advertisements

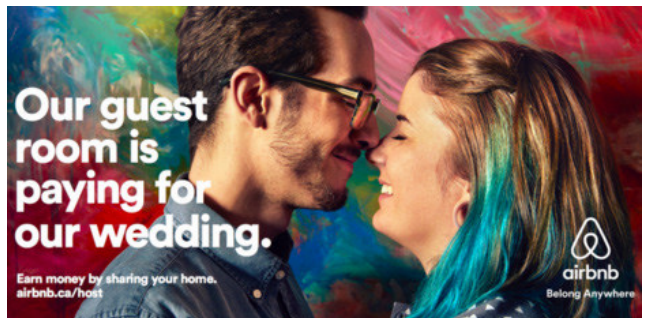

Figure 9. Airbnb advertisement showing the visual concepts of two adults, and the text “Our guest room is paying for our wedding”. “World knowledge” captured by LLMs helps identify the two adults as partners, and helps relate the text with the two adults and the Airbnb logo to infer what the ad is talking about.

| Image                                                                             | Semantic Category     | Verbalization                                                                                                                                                                                                           | Semantic Category    | Verbalization                                                                                                                                   |
|-----------------------------------------------------------------------------------|-----------------------|-------------------------------------------------------------------------------------------------------------------------------------------------------------------------------------------------------------------------|----------------------|-------------------------------------------------------------------------------------------------------------------------------------------------|
| 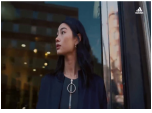 | <b>OCR</b>            | The text shown in the scene is “Adidas”.                                                                                                                                                                                | <b>Clutter</b>       | The clutter in the scene is <b>low</b> .                                                                                                        |
|                                                                                   | <b>ASR</b>            | The audio in the scene is “To take hold of the world’s spotlight overnight”.                                                                                                                                            | <b>Photo Style</b>   | The photography style of the scene is <b>commercial photography</b> .                                                                           |
|                                                                                   | <b>Human Presence</b> | The scene has <b>1 person with prominent face</b> .                                                                                                                                                                     | <b>Emotion</b>       | The emotion of the scene is <b>ambitious, determined</b> .                                                                                      |
|                                                                                   | <b>Caption</b>        | The scene shows <b>a young woman sitting in a glass door looking out</b> .                                                                                                                                              | <b>Aesthetics</b>    | The image has <b>medium</b> aesthetic value.                                                                                                    |
|                                                                                   | <b>Colors</b>         | The foreground colors of the scene are <b>Black, Dark Brown, Dark Blue, Dark Gray, Mud Green</b> and the background colors are <b>Dark Blue, Black, Dark Brown</b> . The dominant tone of the scene is <b>neutral</b> . | <b>Object Tags</b>   | This scene is categorized by the tags: <b>person, woman, blazer, facing, template, fashion, street fashion, cold, client, cardigan, sweat</b> . |
|                                                                                   | <b>Audio Type</b>     | The scene has <b>music and speech</b> .                                                                                                                                                                                 | <b>Logo Presence</b> | There is <b>a logo</b> in the scene.                                                                                                            |

Table 5. To augment the scene understanding of LLM, we verbalize video scenes and images using a diverse set of cognitive and perception tools and pass it to the LLM in the format shown in the table. For image memorability datasets, we use the following semantic categories: caption, color, photo style, emotion, clutter, human presence, object tags, OCR, and aesthetics. For video scene memorability datasets, we use the following semantic categories: caption, color, emotion, human presence, object tags, ASR, OCR, Audio-type, Logo-presence. We use the following models to extract the features: OCR [19], clutter [37], ASR [57], Photo style [44], human presence [46], emotion [65], caption [44], aesthetics [33], colors [56], object tags [74], audio-type [25], and logo presence [74]. Black colored text is the verbalization template, and red text indicates the model outputs.

## C. Ablation Experiments

### C.1. Ablation of Data and Architectural Choices on Memorability Prediction

We also conduct extensive ablations to understand the effect of different kinds of data and architectural choices. Tables 2 and Table 6 show the data ablations. We see that combining datasets actually worsens the performance across all the datasets except the SUN dataset. Further, we find that in zero-shot settings, STM helps in predicting LTM relatively much better than vice versa. This corroborates with the studies in psychology which show that for a content to get committed to LTM, it has to pass through STM [53]. Therefore, content memorable, according to STM, has an effect on LTM but, interestingly, not vice versa. Further, we observe that Henry loses performance for unseen brands. This underscores the importance of scaling the study across more brands. Next, we evaluate the impact of various architectural choices (Table 7). We find that Henry’s vision branch is not strong enough by itself to produce good results. Cognitive features that were found important in our study also improve prediction performance. Low-level features like objects and colors have the maximum impact on STM, but higher-level features like emotion, ASR, and aesthetics have a higher impact on LTM.

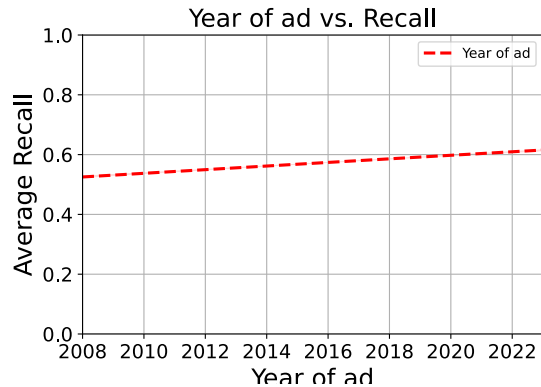

Figure 10. The graph shows the relationship of the year the ad is uploaded on youtube vs the recall.

### C.2. Ablation of Data and Architectural Choices on Memorable Ad Generation

We also run some ablation studies to find the impact of the amount of data (Fig. 11) and the impact of behavior simulation and content simulation tasks (Table 8) on ad quality and memorability. A few trends are noticeable. Performance increases as the amount of data increases. Interestingly, the performance converges very slowly with the amount of increase in data. We test the performance in three conditions: brand-split, time-split, and random-split. In the brand-split testing, we leave some randomly chosen brands out of training and only test on them. For the time-split testing, we

| Generalization Type | Train on             | Zero-shot Testing  | Lamem | Memcat | SUN  | VideoMem | Memento10k | LAMBDA |
|---------------------|----------------------|--------------------|-------|--------|------|----------|------------|--------|
| Memory-type         | Short-term           | Long-term          | -     | -      | -    | 0.31     | -          | 0.18   |
| Memory-type         | Long-term            | Short-term         | 0.06  | 0.08   | 0.07 | 0.15     | 0.1        | -      |
| Modality            | Videos               | Images             | 0.55  | 0.65   | 0.55 | -        | -          | -      |
| Modality            | Images               | Videos             | -     | -      | -    | 0.44     | 0.54       | 0.09   |
| Brands              | All except 20 brands | Left-out 20 brands | -     | -      | -    | -        | -          | 0.42   |
| Dataset             | All except Memento   | Memento            | -     | -      | -    | -        | 0.59       | -      |
| Dataset             | All except Memcat    | Memcat             | -     | 0.68   | -    | -        | -          | -      |

Table 6. Ablation across data to understand how memorability prediction generalizes across the type of memory, datasets, modality (image/video), and brands. The reported values are correlations between model and human memorability scores. A few trends can be observed from the table: (i) STM generalizes better on LTM in zero-shot than vice versa (rows 1 and 2), (ii) Henry trained on either videos or images generalizes to both (rows 3 and 4), (iii) There is a significant performance loss in modeling memorability for brands not seen during training (row 5), (iv) Zero-shot generalization to Memento (video) and Memcat (image) is near to the current trained state of the art literature models on Memento [20] and Memcat [28] (rows 6 and 7).

|                              | Lamem | Memcat | VideoMem(ST) | Memento10k | VideoMem(LT) | LAMBDA |
|------------------------------|-------|--------|--------------|------------|--------------|--------|
| Henry on individual datasets | 0.74  | 0.82   | 0.64         | 0.75       | 0.48         | 0.55   |
| Henry vision only            | 0.20  | 0.17   | 0.17         | 0.21       | 0.15         | 0.11   |
| Henry language only          | 0.51  | 0.53   | 0.42         | 0.54       | 0.37         | 0.44   |
| Henry -object tags           | 0.67  | 0.71   | 0.57         | 0.69       | 0.46         | 0.52   |
| Henry -colors                | 0.65  | 0.74   | 0.55         | 0.67       | 0.45         | 0.51   |
| Henry -emotion               | 0.71  | 0.78   | 0.61         | 0.73       | 0.42         | 0.46   |
| Henry -aesthetics            | 0.72  | 0.79   | 0.61         | 0.71       | 0.46         | 0.53   |
| Henry -clutter               | 0.73  | 0.81   | 0.60         | 0.74       | 0.45         | 0.53   |
| Henry -asr                   | -     | -      | -            | -          | -            | 0.46   |
| Henry -asr-emotion           | -     | -      | -            | -          | -            | 0.42   |
| Henry on Silent Ads          | -     | -      | -            | -          | -            | 0.56   |
| Henry on Ads with audio      | -     | -      | -            | -          | -            | 0.52   |

Table 7. Ablation across architectural choices. “-” denotes non-speech dataset. A few trends are visible from the table: (i) Despite having a vision branch, object tags and colors have a net positive impact on the overall performance (rows 2,3,4), (ii) For LTM (LAMBDA, VideoMem (LT)), dropping cognitive features such as emotion, aesthetics, and clutter cause a larger performance drop than dropping visual features such as objects and colors. The trend is the opposite for STM (Lamem, Memcat, VideoMem (ST), Memento10k).

| Task    | LAMBDA ( $\rho$ ) | $\Delta$ Memorability |
|---------|-------------------|-----------------------|
| BS-only | 0.541             | -                     |
| CS-only | -                 | +28.41                |
| BS+CS   | 0.547             | +30.66                |

Table 8. Ablation on modeling behavior simulation (BS) or memorability prediction and Content Simulation (CS) on memorable ad generation together. For memorability prediction, we again show the Spearman rank correlation on the test set similar to Table 2; for generation, we measure the change in memorability according to Henry Oracle similar to Table 3. We observe that mixing the two tasks together increases the performance across both tasks.

put a cutoff time; we train our model before that cutoff time and test on ads after that time. For the random-split testing, we test on randomly selected advertisements. Brand-split performs worse than time-split testing, indicating that brands have a higher contribution to determining memorability. This trend is observed only in ad memorability but not in ad quality.

We also test the impact of various subsets of UltraLAMBDA on the memorability of the ads generated by Henry-SEED. Table 3 shows the results. It can be seen that adding the high memorable samples from LAMBDA train set, increases the memorability of generated ads substantially. We also train LLaVA on the complete set of 2 million UltraLAMBDA ads without filtering it via Henry assigned memory labels. Interestingly, this model, while trained on 2.5 times more data than UltraLAMBDA filtered via Henry, has lesser average memorability than it.



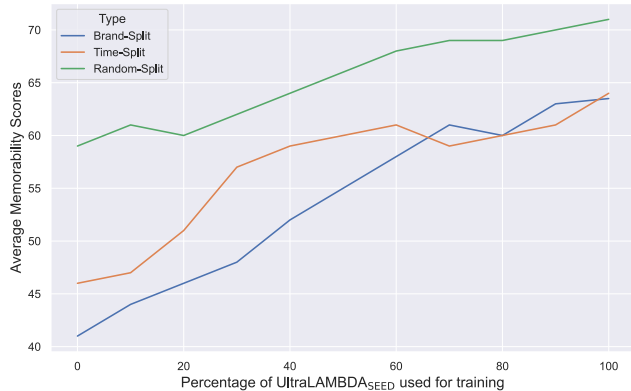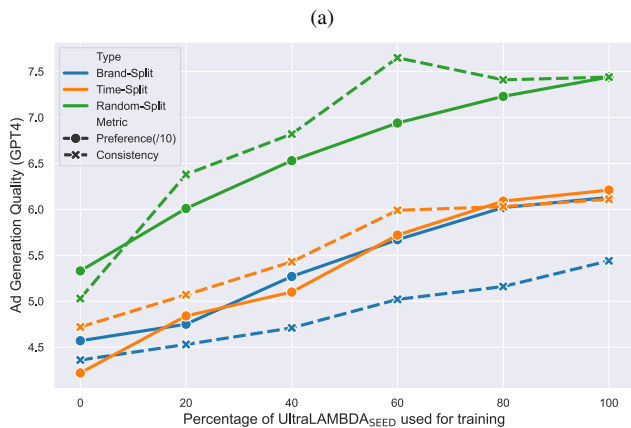

Figure 11. Graphs showing the importance of the amount of synthetic data on (a) Ad memorability score and (b) Ad quality for the generated ads. As we can see from the graphs, both the ad memorability and quality increase with the increase in the amount of synthetic data.

## D. Questionnaire to Gather Human Preferences over Generated Ads

Below is the web-based form used to annotate the human preferences between the generated and original ad stories. Participants for this task were working professionals in the software, marketing, advertising, and creative industries. Participation was voluntary, and participants were invited to judge the efficacy of generated advertisements. Participants had a general interest in the creative and advertising industries and generative technologies; therefore, they were not interested in getting paid but rather in seeing and trying out the generative technology stack. We have a roughly 65-35 distribution of males to females with the age range between 22-50.

Instructions :

Shown next are 10 pairs of advertisements. Determine which ad within each pair is more effective based on the title, brand, and scene-by-scene descriptions provided. You will also be expected to provide reasons for your choice wherever asked.

### Question 1

Choose the advertisement you find more effective. Also provide reasons for your choice.

Title: Bike to Work Day at NVIDIA

Brand: Nvidia

Nvidia is a technology company focusing on graphics processing units (GPUs) for gaming, professional visualization, data centers, and automotive markets, driving innovation in visual computing.

#### Advertisement A:

The ad is shot in landscape orientation, at a medium pace. The audio in the ad is silent.

Scene 1: The scene shows the camera takes a photo from the inside of the person on the bicycle

Colors: White, Dark.Pink, Olive, Gray, Pink, Dark.Brown

Emotions: danger, dangerous, warning

Tags: attach, bicycle, catch, smartphone

Scene 2: The scene shows the person riding a bicycle down the road

Colors: White, Dark.Gray, Mud.Green, Olive, Gray

Emotions: danger, quiet

Tags: bicycle, path, grass, motorbike

The text shown in the scene is 'NVIDIA'

Scene 3: The scene shows a man on a bike taking a ride

Colors: Off.White, Dark.Gray, Silver, Black, Gray

Emotions: danger, exciting, fun

Tags: bicycle, biker, bridge, hand

The text shown in the scene is 'NVIDIA'

Scene 4: The scene shows a bike rider going under a bridge under a road

Colors: Dark.Gray, Silver, Light.Green, Green, Olive, Gray, Bright.Green

Emotions: danger, dangerous, funny

Tags: bridge, car, curve, highway

The text shown in the scene is 'NVIDIA'

Scene 5: The scene shows a man riding a bicycle down a tree lined street

Colors: White, Dark.Gray, Mud.Green, Dark.Pink, Olive, Black, Gray

Emotions: thrill, adventure, romantic

Tags: bicycle, biker, hand, person

The text shown in the scene is 'NVIDIA'

Scene 6: The scene shows a man riding on a bicycle down the street

Colors: Emerald, Dark.Gray, Silver, Light.Green, Olive, Gray

Emotions: funky, enjoyable

Tags: bicycle, hand, person, man

The text shown in the scene is 'NVIDIA'

Scene 7: The scene shows a closeup of someone riding a bicycle down a road

Colors: White, Dark.Gray, Silver, Dark.Pink, Olive, Gray

Emotions: danger, majestic

Tags: bicycle, bicycle helmet, biker, hand

The text shown in the scene is 'NVIDIA'

Scene 8: The scene shows a person is riding a bike on the side of the road

Colors: White, Dark.Gray, Mud.Green, Olive, Gray, Lavender

Emotions: enjoy, enjoyment

Tags: car, person, man, motorcycle

The text shown in the scene is 'NVIDIA'

Scene 9: The scene shows someone riding a bike in front of a small city

Colors: White, Dark.Gray, Olive, Black, Gray

Emotions: funky

Tags: bicycle, biker, bin, car

The text shown in the scene is 'NVIDIA'

Scene 10: The scene shows a cyclist riding his bike on a gravel road

Colors: White, Brown, Mud.Green, Olive, Gray, Dark.Brown, Cyan

Emotions: recreational, adventure

Tags: bicycle, biker, hand, person

#### Advertisement B:

The ad is shot in landscape orientation, at a low pace. The audio in the ad is silent.

Scene 1: The scene shows a man wearing a hard hat holding a bike helmet

Colors: Dark.Gray, Brown, Mud.Green, Cream, Olive, Black, Dark.Brown

Emotions: protective, protective

Tags: building, construction worker, hat, jumpsuit

Scene 2: The scene shows a man riding a bike on a path near a creek

Colors: Emerald, Dark.Gray, Mud.Green, Olive, Black, Dark.Brown

Emotions: recreational, relaxation

Tags: bicycle, bicycle helmet, biker, path

Scene 3: The scene shows a man holding a bike up while standing in front of a building

Colors: Dark.Gray, Brown, Mud.Green, Cream, Olive, Black, Dark.Brown

Emotions: pride, achievement

Tags: building, professional, hat, bicyclist

Scene 4: The scene shows a man riding a bike down a street with trees lining the road

Colors: Brown, Cream, Green, Olive, Dark.Brown

Emotions: cheery, freedom

Tags: bicycle, bicycle helmet, biker, man

Scene 5: The scene shows a man riding a bike down a street in front of a house  
 Colors: Dark.Gray, Mud.Green, Olive, Black, Dark.Brown  
 Emotions: cheery  
 Tags: bicycle, bicycle helmet, biker, car

Scene 6: The scene shows a closeup of the man's face as he adjusts his bike helmet, showcasing determination  
 Colors: Cream, Olive, Black, Gray, Dark.Brown  
 Emotions: determined, prepared  
 Tags: man, helmet, focus, detail

Scene 7: The scene shows the man holding his bike next to other cyclists at a traffic light, promoting community and camaraderie  
 Colors: Mud.Green, Cream, Olive, Dark.Brown  
 Emotions: community, anticipation  
 Tags: cyclists, traffic light, group, waiting

Scene 8: The scene shows the man arriving at work, parking his bike in a bike rack  
 Colors: Mud.Green, Cream, Olive  
 Emotions: satisfaction, accomplishment  
 Tags: office building, bike rack, arrival, work

Scene 9: The scene shows the man walking into the building, greeting colleagues who are also carrying bike helmets  
 Colors: White, Cream, Olive, Black, Gray  
 Emotions: friendly, inclusive  
 Tags: workplace, colleagues, greeting, professional attire

Scene 10: The scene shows the man at his workstation with a helmet on his desk, looking out the window at the sunny day, hinting at the ride home  
 Colors: White, Cream, Olive, Gray  
 Emotions: thoughtful, accomplished  
 Tags: office, workstation, helmet, window

Select preferred advertisement:  
 Option 1: A  
 Option 2: B  
 Option 3: Both are equally effective

Give reasons for your choice:  
 -----

## D.1. Expert Feedback Collected For Generated Ads

### 1. Feedback for ad generation for the Maytag Ad shown in Fig 6

- (a) **Expert 1:** "I appreciate the prominent use of the logo in the advertisement. Its placement towards the end, accompanied by a compelling slogan, is in alignment with the brand's advertising strategy."
- (b) **Expert 2:** "In my opinion, the color scheme of the advertisement is stunning. It complements the tone of the advertisement exceptionally well."
- (c) **Expert 3:** "The emotional portrayal in scene 2 could be enhanced. I anticipated a sense of 'recreation' and 'relaxation' to be more effectively conveyed."

### 2. Feedback for ad generation for the New York Times Ad shown in Fig 5

- (a) **Expert 1:** "One noteworthy aspect in the generated ad description is the concept of 'blocking.' In the ad, the main actor is depicted moving and protesting against various backdrops, including a static background and a subtly shifting frame. This technique is reminiscent of the famous concept utilized in cinematography. While this is not reflected in the image, I will attribute it to the image generation and not the description generation."

(b) **Expert 2:** "I like the generated voiceover a lot in terms of story, but I find it hard to fit over the scenes, perhaps this is because the generations don't incorporate transitions/animations."

(c) **Expert 3:** "I find the overall generated story exceptional in terms of its storytelling in a few ways. 1. The flow of the generated ad, A woman exploring nightlife, protesting, achieving, and nonetheless standing defiant. 2. The slogans are great. 3. The changing head tilt of the woman from sideways to center is a very precise details cinematographer use to paint an overall story or emotion."

### 3. Feedback for ad generation for the Brainly Ad shown in Fig 3

(a) **Expert 1:** "I find the overall story formulation to be decent. It portrays kids encountering challenges in solo learning, showcasing easy accessibility and a gradual improvement in confidence and engagement throughout the story. I would still prefer a scene where the UI of the app is somehow shown to the user."<sup>8</sup>

(b) **Expert 2:** "I like the use of animated scenes, but I find the incorporation of different main characters slightly jarring. Either they should have been in a common scene, or the main character should not change with every scene. The standout feature of the ad is the utilization of color themes and their harmonization with the emotional tone of each scene."

(c) **Expert 3:** "Having created Ed-Tech advertisements, I find the storytelling to be excellent. This ad is very persuasive, although it lacks novelty, I still find it to be effective."

## E. Perplexity evaluation

A common approach to measuring language modeling performance on some data distribution  $D$  is to measure *perplexity*, which is defined as the exponential of the average negative loglikelihood per token [9, 10, 31], that is:

$$PPL = \exp \left( \frac{-1}{\sum_{j=1}^{|D|} N_j} \sum_{j=1}^{|D|} \sum_{i=1}^{N_j} \log P(y_{j_i} | y_{j_1}, \dots, y_{j_{i-1}}) \right), \quad (1)$$

where  $|D|$  is the number of documents in the dataset,  $y_j$  is the  $j$ -th document in  $D$ ,  $N_j$  is the total number of tokens in  $y_j$ , and  $y_{j_i}$  represents the  $i$ -th token of  $y_j$ .

<sup>8</sup>The generated description of the ad actually shows the student interacting with a visible UI that the image generation model could not respect properly

To calculate perplexity on a selected dataset  $D$ , each dataset document  $y$  is tokenized and fed into a language model (following the procedure described below) via computing  $\log P(y|x)$ , where  $x$  is set to either the empty string or a beginning-of-text token. Thus, given  $\log P(y)$ , for each document  $y \in D$  we can sum up the per-document loglikelihoods and divide by the number of total dataset tokens.

Given our language model, we aim to compute the conditional (log) probability (or “loglikelihood”) of a target string  $y$  conditioned on input  $x$ , denoted as  $\log P(y|x)$ . This can be performed in a single LM call.

Let  $x = x_0, x_1, \dots, x_{n-1}$  be an input sequence of  $n$  tokens and  $y = y_0, y_1, \dots, y_{m-1}$  be the target sequence of  $m$  tokens, where  $x_i$  and  $y_i$  represent individual tokens. To compute  $\log P(y|x)$ , we follow these steps:

1. Concatenate  $x$  and  $y$  to form a new sequence, but discard the final token  $y_{m-1}$ . The resulting sequence is  $x_0, x_1, \dots, x_{n-1}, y_0, y_1, \dots, y_{m-2}$ .
2. Pass this concatenated sequence through the language model to obtain logits  $l$  of shape  $(n+m-1, |V|)$ , where  $|V|$  is the size of the vocabulary. The last  $m$  positions in these logits correspond to the predicted probability distributions for the target tokens  $y_0$  to  $y_{m-1}$ , conditioned on the input  $x$  and the preceding target tokens.
3. Apply a log-softmax function to the last  $m$  logits to obtain log probabilities for the completion tokens only.
4. Calculate the conditional loglikelihood of the target string  $y$  given the input  $x$  by summing the log probabilities of each target token:

$$\log P(y|x) = \sum_{i=0}^{m-1} \log p(y_i|x, y_0, \dots, y_{i-1}) = \sum_{i=0}^{m-1} l(n+i, y_i), \quad (2)$$

where  $\log p(y_i|x, y_0, \dots, y_{i-1})$  is the log probability of the  $i$ -th target token conditioned on the full input  $x$  and the preceding target tokens. (and where  $x, y_0, \dots, y_{i-1}$  denotes conditioning on only  $x$ .)

We follow the above procedure to calculate perplexity over three equally divided parts of the dataset, *i.e.*, 33-percentile cuts where samples are ranked as per their memorability values. The lower the perplexity of an LLM over a category of samples, the better it is at generating those samples. Therefore, for example, if an LLM has a lower perplexity over high memorable samples, it is easier for it to generate highly memorable samples than lower memorable ones.

## F. Annotation Protocol and Participant Details for the LTM Study

Figure 12 shows a visualization of the annotation protocol we followed.

The participants in the study were students who were offered optional course credit and freebies like eatables and a chance to see research and know their memorability scores. The participation was voluntary. The students were shown a protocol of the study and were required to sign the IRB approval, which was prominently displayed. The approval contained details about what kind of data was being collected and how the data would be used. The data collection protocol was approved by the IRB of the participating institution. The aggregate statistics were reported to each candidate after completing the study. Three emails were sent to take-home participants; if they didn’t reply within the given time frame, their data was discarded from the experiment.

The participants were primarily graduate and undergraduate students. The participants are from two universities spread across two locations in India. The participants are bilingual and speak a variety of languages, including English. The age range is from 16 to 35 years, and all genders/sexes are encouraged. We saw a roughly 30-70 distribution of females to males.

### F.1. Memorability Questionnaire

This section contains the questions we asked before the study, the attention check questions that were asked during the study, and finally, the recognition questions to check which brands were remembered.

#### F.1.1 Introductory Questionnaire (to be filled before the study starts)

1. I remember seeing ads for the following brands this year:
  - List 15 randomly selected from the list of brands that we have
2. I remember using products of the following brands this year:
  - List 15 randomly selected from the list of brands that we have (non-intersecting list from above)
3. Have you installed any Ad Blocking software in your browser(s)?
  - a. Yes
  - b. No
4. Do you use a Youtube subscription?
  - a. Yes

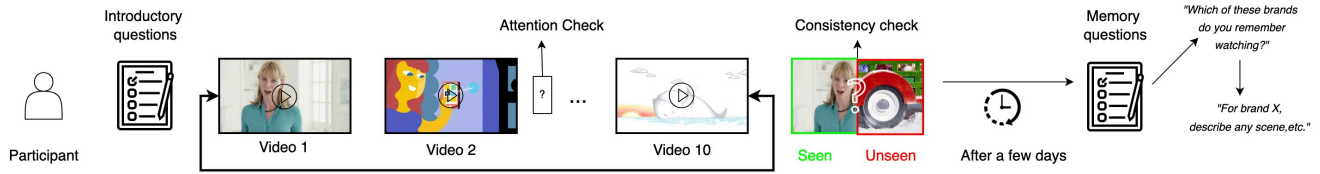

Figure 12. The study protocol we followed for our long term memorability human study. All the previous works follow a game-like annotation protocol, where the study participants compete with each other to get best memorability scores and a participant is excluded from the study if their annotations fall below a certain threshold. We follow a more natural way in which participants fill an initial questionnaire, then watch 10 ads with attention checks on day 1 and in subsequent days, receive a form asking them to fill in what do they remember seeing. Further, using Stable Diffusion, we also ask them to recreate the scenes they remember.

b. No

5. Approximately how much percentage of time do you spend on Youtube mobile vs Youtube web?

- <10% on mobile
- >10% but <30% on mobile
- >30% but <70% on mobile
- >70% on mobile

6. How do you apprise yourself of the latest products and brands? (Multi correct)

- Primarily friends and family
- Amazon, Flipkart or any other e-commerce stores
- Television and OTT Platform Ads (like Youtube, Netflix, Hotstar, etc)
- Email Ads
- Store Visits
- Website Ads
- I primarily search for products

### F.1.2 Checks (to be answered during the experiment)

1. **Attention check:** A factual question like, What is the capital of India? (Asked randomly between videos, needs to be answered in <10s)

- a. Kanpur
- b. Delhi
- c. Goa
- d. Mumbai

2. **Consistency Check:** Do you remember watching this video in this experiment (Asked after showing the 11th video)

- a. Yes
- b. No

### F.1.3 Recognition Questions (asked after a few days after watching the videos)

1. In the study, I remember seeing Ads of the following brands:

- (Randomly selected list of 20 brands which contains the brands shown to the participant)
- {For each brand in the list which the participant has selected}

2. Brand: X (already filled in)

- For the {brand} ad, I remember seeing the following (Write Scene Descriptions, feel free to write any scenes, music, characters, emotions, objects you remember seeing):

## G. Collection of all the Prompts used in the Paper

### G.1. GPT-4 Prompts

Listing 11. GPT-4 Prompt to calculate preference between Real Ad (A) and Generated Ad (B)

As a seasoned marketer, evaluate the effectiveness of the following two ads using a comprehensive set of metrics:

**Creativity and Innovation:** Originality and uniqueness in conveying the message. Use of unexpected ideas or elements that grab viewers' attention.

**Emotional Connection:** Ability to evoke strong, relevant emotions in the target audience. Establishing a connection between the brand and the viewers' emotions.

**Storytelling:** Crafting a compelling narrative that engages and retains the audience. Creating a memorable experience through a coherent and impactful story.

**Visual Appeal:** Use of strong visual elements, such as striking visuals, colors, and graphics. Ensuring that the visual elements align with the overall message and brand image.

**Brand Alignment:** How well the ad aligns with the values, mission, and personality of the brand. Consistency with the brand's visual identity, tone, and messaging. The ad's ability to leave a lasting impression on viewers regarding the brand. Incorporating brand elements that make it easy for the audience to remember and recognize.

**Target Demographics:** Relevance of the ad content and message to the target audience. Appropriateness of visuals, language, and themes for the specific demographic group.

Based on these criteria, analyze and determine which of the two ads is more effective. I will provide you with the Voiceover, followed by their scene-by-scene descriptions, including the emotions shown in the scene, the text, objects, colors, and style of the image.

```
Ad (A): {Verbalization for Ad (A)}
Ad (B): {Verbalization for Ad (B)}

Give me your answer in a json format, with the following keys:
- ad_a_score: Score between 0 and 10 for Ad A
- ad_b_score: Score between 0 and 10 for Ad B
- winner: The winner of the two ads
- reason: line separated Reasons for the winner in not more than 3 lines
```

Listing 12. GPT-4 Prompt to measure consistency of an Ad

```
You are now a seasoned marketer that judges the consistency of an advertisement well. The consistency of an Ad can be determined by a few metrics (in no particular order) such as:
1. Does the voiceover match with the Scenes in the Ad?
2. Do the scene description make a good story?
3. Are the emotions depicted in the scenes consistent with the overall ad?
4. Does the ad represent the product and the brand well?

Rate the consistency of the following ad out of 10. Give me the rating only and nothing else, or you will be penalized.
{Advertisement Description}
```

Listing 13. GPT-4 Prompt to generate ad verbalization with In-Context-Learning (ICL)

```
You are now a seasoned marketer that creates memorable ads given its duration, brand and title.
Your output should follow the writing style of the input exactly. For example, each scene should look like:
The scene shows {}. The foreground colors of the scene are {}, and the background colors are {}. The dominant tone of the scene is {}. The photography style of the scene is {}. The scene has {} visual complexity. The emotions shown in the scene are {}. This scene is categorized by the tags {}.
You are only supposed to fill in the {}

Generate the detailed description of a {DURATION.AD1} second memorable advertisement titled "{TITLE.AD1}" for the brand {BRAND.AD1}
Generate the detailed description of a {DURATION.AD2} second memorable advertisement titled "{TITLE.AD2}" for the brand {BRAND.AD2}
...
Generate the detailed description of a {DURATION.AD5} second memorable advertisement titled "{TITLE.AD5}" for the brand {BRAND.AD5}
Generate the detailed description of a {DURATION.TARGET} second memorable advertisement titled "{TITLE.TARGET}" for the brand {BRAND.TARGET}
```

## G.2. Henry Prompts

Given below are the verbalization templates we use to teach Henry and Henry-SEED behavior simulation and content simulation tasks:

Listing 14. Verbalization pattern to predict memorability given advertisement. The same template is used to prompt GPT-3.5, GPT-4, Henry, Henry-Oracle, and Henry-SEED. Note that video tokens are optional.

```
Students are shown ads and their memorability is tested after 1 to 3 days. For the given ad:
<video> .. </video>
They watch a 15 second advertisement for Chanel.
The title of the advertisement is " Comes in Red for a Limited Edition CHANEL Fragrance".
The ad is shot in landscape orientation, at a medium pace.
The audio in the ad says: Number 5. Limited Edition. Chanel.
Following are the descriptions of each scene:
Scene 1:
```

```
The scene shows a red bottle of perfume that is on a dark surface.
The foreground colors of the scene are Black, and the background colors are Dark_Brown,Maroon, Black,Gray.
The dominant tone of the scene is neutral.
The photography style of the scene is product.
The scene has Low visual complexity.
The emotions shown in the scene are gift, romantic, celebration.
This scene is categorized by the tags bottle, man, perfume, red, woman.
The text shown in the scene is 'N5', 'CHANEL', 'PARIS', 'PARFUM'
....
```

What would be the memorability score of this video?

Output: 71

Listing 15. Henry Prompt to generate ad verbalization used to train and evaluate Henry-SEED

```
Generate the detailed description of a {DURATION.TARGET} second memorable advertisement titled "{TITLE.TARGET}" for the brand {BRAND.TARGET}
```

## G.3. Mistral prompt for filtering marketing ads

Listing 16. Mistral Prompt for Ad Filtering

```
"Based on the topic_tags_vocab = {'politics': 'The art and science of governing societies and making decisions that affect collective interests.', 'marketing': 'The process of promoting, selling, and distributing products or services to consumers, often involving market research, advertising, and branding strategies.'} provided, please identify the top most relevant topic tag from the topic_tags_vocab keys that represent the following advertisement based on content and page.name. Please use only the most relevant tag and make sure to choose from provided topic tags only. Do not include any other tags not mentioned in the prompt. Answer with the most relevant topic tag only. The advertisement is posted by the page Donald J. Trump and has the following content: ['President Trump is coming to town! Get your free tickets now >>>']. Answer in only politics or marketing."

cleaned_text = "The advertisement is posted by the page {page.name} and has the following content : {page.content}"
```

## H. Computing Infrastructure and Hyperparameters

### H.1. Modeling Memorability

All the experiments were conducted on 8x40 A100 instances. All experiments were performed leveraging DeepSpeed ZeRO stage-3 with cpu offload [58–60] and Flash-attention [18] with gradient-checkpointing [14] at bf16 precision. We use AdamW as the optimizer (with fused gelu), the learning rate was kept 2e-5 for all experiments. The

maximum context length for image-only datasets is 500, including public video datasets is 800 and including our dataset is 2048. The corresponding batch sizes are 32,16,8. The gradient accumulation is set to 1 and weight decay is disabled. The warmup steps are set to 20 and residual dropout was kept at 0.25. We train all models for two epochs, but use the checkpoint with best validation spearman correlation.

For all experiments, where we combine datasets, we use a custom sampler to account for dataset imbalance, that ensures a maximum proportion of the dataset in an epoch, here are the maximum proportions. For validation we take 5% of each dataset. We use the provided test splits for public datasets and we use a 15% test split for our dataset

### H.1.1 Images

1. **Lamem** 50%
2. **Memcat** 100%
3. **SUN** 100%

### H.1.2 Videos

1. **VideoMem** 75%
2. **Memento** 75%
3. **AdsData** 100%
4. **MediaEval** 100%

## H.2. Generating Memorable Ads

All the experiments were conducted on 8x80 A100 instances. All experiments were performed leveraging DeepSpeed ZeRO stage-2, Flash Attention and Gradient-Checkpointing.  $\alpha = 0.001$ ,  $\text{awac\_scale} = 1$ ,  $\gamma = 0.99$ ,  $\beta = 0$   $\text{cql\_scale} = 0.1$

### H.2.1 Inference hyperparameters

$\beta = 4$ ,  $\text{temperature} = 0.8$ ,  $\text{steps\_for\_target\_sync} = 10$ ,  $\tau = 0.7$ ,  $\text{two\_qs} = \text{True}$ ,  $\text{lr} = 1\text{e-}5$

## I. License and Terms of Release

LAMBDA and UltraLAMBDA are sourced from brand videos from YouTube, Facebook Ads, and CommonCrawl. The dataset annotations and video links contained in LAMBDA and UltraLAMBDA will be released under CC BY-NC 4.0 license. The videos themselves are released as per their creators' licenses. The videos or the released data do not contain or disclose any identities of their annotators or any specific persons. Since it is handcrafted, LAMBDA makes sure that none of the videos are offensive; UltraLAMBDA being sourced from the internet is noisier. While

the videos themselves originate from brands, the content of some brands may seem offensive to certain people.

We used Llama, GMHRA, ViT, EVA-CLIP, and Qformer models in accordance with their licenses to train Henry.

## J. Limitations and Potential Risks

In this paper, we try to fill a gap in the existing literature about long-term memorability modeling and datasets. Therefore, we conduct the first study for that purpose. While doing that, we have made initial efforts starting with the English language advertisements. Future work would be needed to address other languages. Further, given the limitations of the study, we conducted it in an academic environment with a student population consisting of undergraduate and graduate student volunteers. We will expand the scope to a wider audience in the future work. We trained a model, Henry, on the collected dataset, showing good performance on all literature datasets. However, since the literature datasets are all English-based and deal with a majorly uniform population, the training will be scaled to more languages and population types in future work. We also observed a decrease in performance for brands not seen during the training and for videos with longer verbalizations exceeding 1500 tokens. Additionally, the model exhibits a slight inaccuracy when advertisements have significant musical content. In our opinion, the model does not pose any potential risk or harm besides the limitations mentioned here. We also conduct a review of the generated ads through experts and non-expert annotators. Both experts and non-expert annotators preferred Henry-SEED generated ads 3/5 times.
